# Supplementary material
Source: Elsevier journal article supplement (https://www.sciencedirect.com/science/article/pii/S2529849622000041)
Supplement: mmc1 [file S2529849622000041:mmc1.doc]

Supplementary data

| **Patient number** | **EEG pre-op** | **EEG post-op** |
| --- | --- | --- |
| 1 | Left beta activity progressing to bilateral slow teta activity | Left spike wave and sharp wave-slow wave |
| 2 | Four seizures beginning in the right temporal region. | Rare left sharp-wave slow-wave |
| 3 | Right spikes and spike-waves with temporal origin | Asymmetry suggesting a "split brain".  Right fronto-temporal slow teta and delta waves with spike and sharp waves.  Left hemisphere with slowing activity. |
| 4 | Three seizures beginning in the left frontal region | Right fronto-temporal spike waves. Left hemispheric slowing. |
| 5 | Left frontal continuous sharp waves and spikes and spike-waves, sharp waves-slow waves | Left frontal slow waves. During sleep sharp waves and spikes, sometimes with slow waves associated (left fronto-temporal). |
| 6 | Left hemispheric spike, polyspike and spike waves.  Right clonic crisis during sleep | Inter-hemispheric asymmetry with almost continuous left spike waves and sharp and slow waves. |
| 7 | Left frontal spikes with progression to bilateral spike and wave | NA |

Table 1 (supplementary): Detailed view of EEG findings. NA: not available

| **Patient number** | **MRI findings** |
| --- | --- |
| 1 | Encephaloclastic lesions more prominent in the left temporal, occipital and parietal lobes but also involving the frontal lobe, left thalamus and basal ganglia. |
| 2 | Right fronto-temporo-parietal and insular lesion encephaloclastic lesion with extension to the right basal ganglia and thalamus. Right cerebral peduncle atrophy. Right hippocampal atrophy. |
| 3 | Right fronto-temporo-insular encephaloclastic lesion. Right basal ganglia and thalamus atrophy. Right pyramidal tract atrophy. |
| 4 | Left fronto-temporo-parietal encephaloclastic lesion with basal ganglia and thalamus involvement. Left hippocampal atrophy. Left cerebral peduncle atrophy  Right cortical frontal lesion. |
| 5 | Evidence of the 2 previous surgeries in left parietal and temporal location. Displastic left brain parenchyma in fronto-orbital, medial surface of parietal lobe, medial surface of frontal lobe and cingulate gyrus. |
| 6 | Multicysticencephalomalacia involving all left cerebral hemisphere. Septum pellucidum destruction. Left cerebral peduncle atrophy |
| 7 | Left encephaloclastic lesion involving precentral, postcentral and superior and inferior parietal gyrus. Lesion also extending to corona radiate, internal capsule, thalamus and lateral mesencephalus. Right encephaloclastic precentral gyrus lesion. Corpus callosum atrophy. |

Table 2 (supplementary). MRI detailed descriptions for all patients


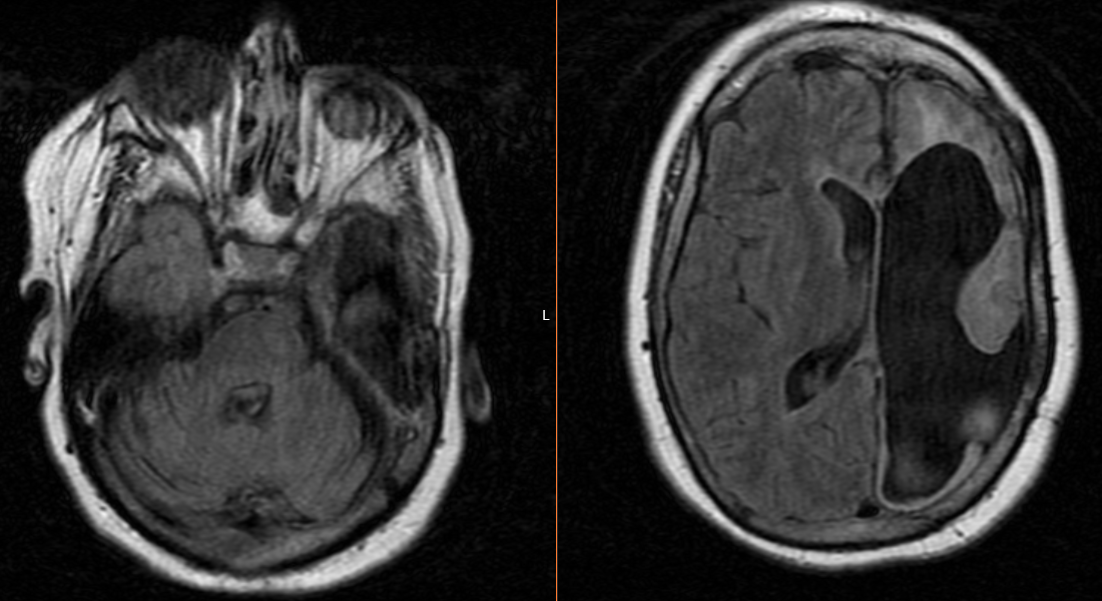

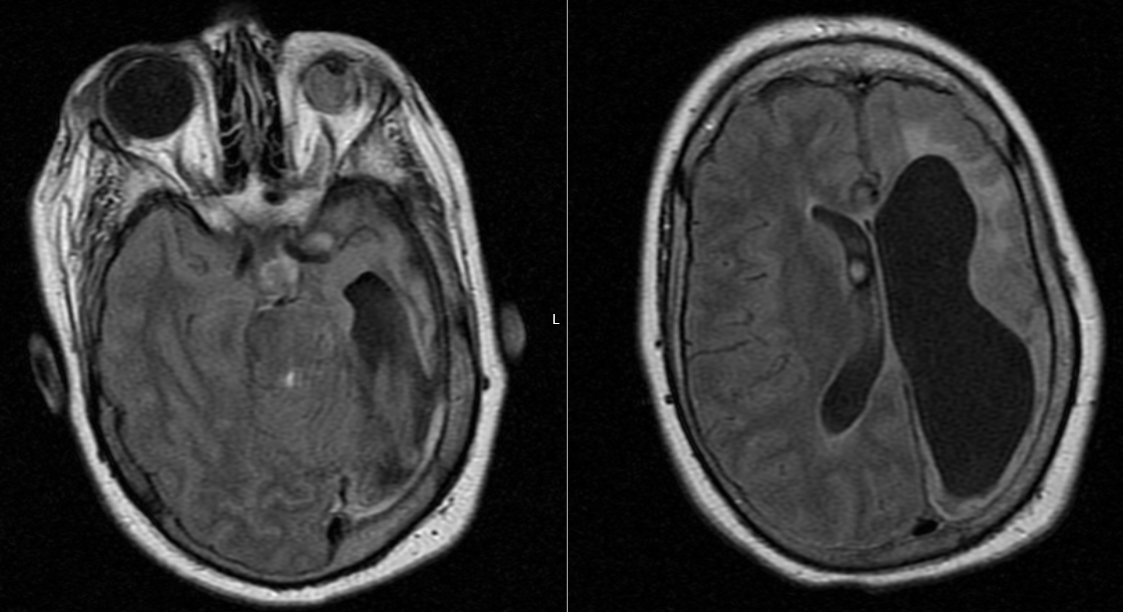


Image 1. Pre-op (upper images) and post-op (lower images) of patient number 1. Encephaloclastic lesions more prominent in the left temporal, occipital and parietal lobes but also involving the frontal lobe, left thalamus and basal ganglia. Prominent porencephalic dilation of the lateral ventricle.


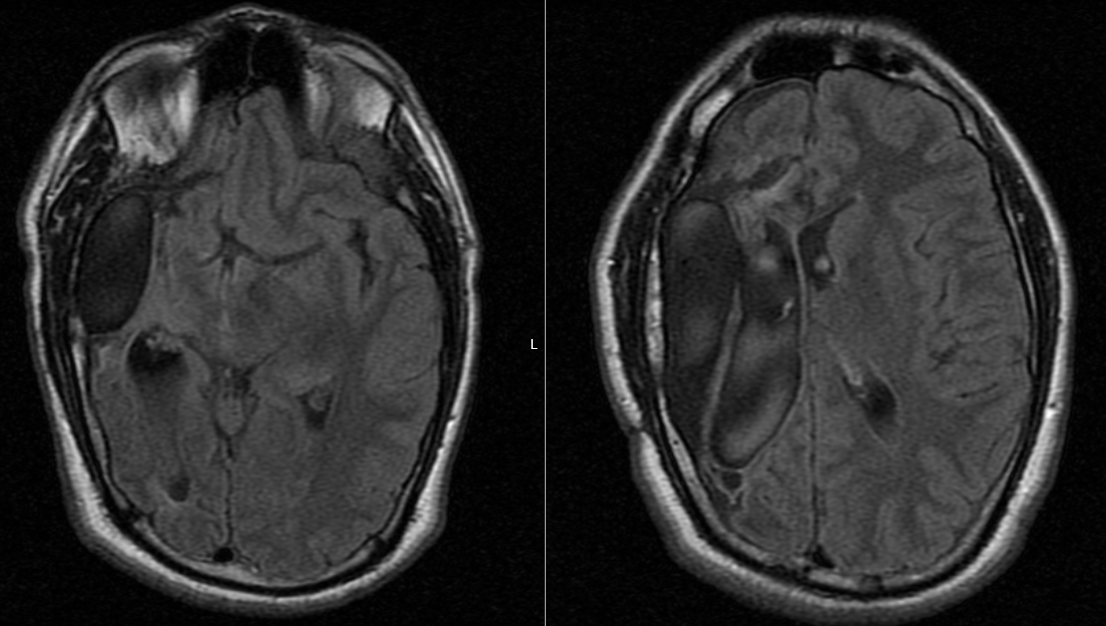

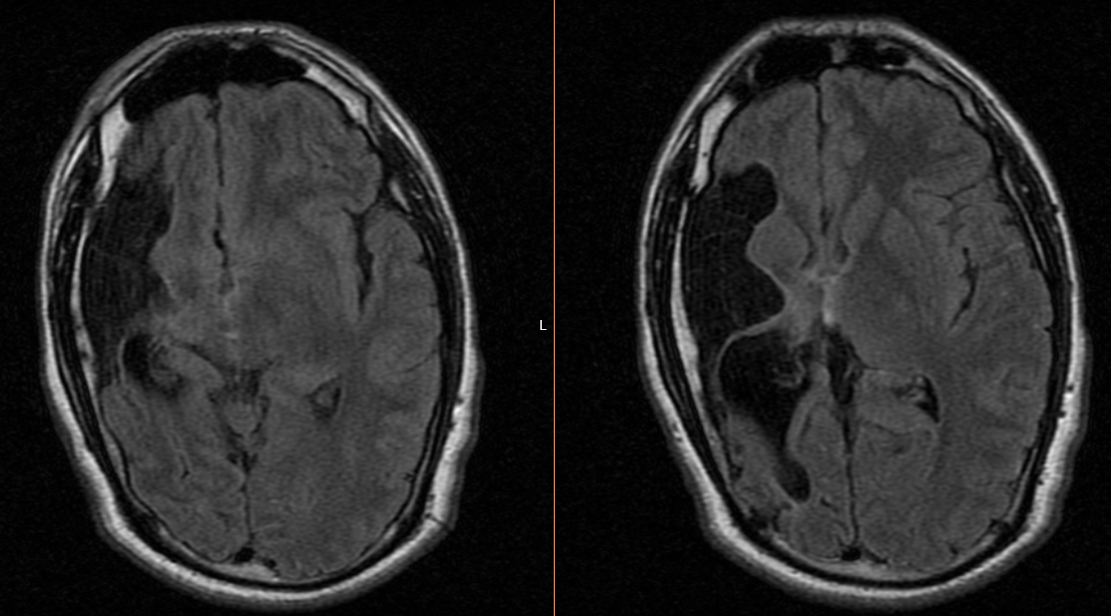


Image 2. Pre-op (upper images) and post-op (lower images) of patient number 2.

Right fronto-temporo-parietal and insular lesion encephaloclastic lesion with extension to the right basal ganglia and thalamus. Right cerebral peduncle atrophy. The approach to the hemispheric disconnection can be appreciated.
